# Supplementary material for: Subclinical Atherosclerosis, Vascular Risk Factors, and White Matter Alterations in Diffusion Tensor Imaging Findings of Older Adults With Cardiometabolic Diseases
Source: PubMed Central journal article supplement (PMC8417784; doi:10.3389/fnagi.2021.712385), 2021-08-20
Supplement: Table_1.pdf [file Table_1.pdf]

**Supple Table 1 White matter tracts investigated as regions-of-interest**

Left/right Anterior thalamic radiation (ATR)

Forceps minor (FM)

Left /right inferior frontooccipital fasciculus (IFOF)

Left /right superior longitudinal fasciculus (SLF)

**Supple Table 2. Spearman correlations of cardiovascular risk factors with FA and MD in seven white matter tracts**

|                              |                | FA             |                    |                    |                    |                    |               |                    | MD                 |                    |                    |                    |                    |                    |                    |
|------------------------------|----------------|----------------|--------------------|--------------------|--------------------|--------------------|---------------|--------------------|--------------------|--------------------|--------------------|--------------------|--------------------|--------------------|--------------------|
|                              |                | IATR           | rATR               | FM                 | IIFO               | rIFO               | ISLF          | rSLF               | IATR               | rATR               | FM                 | IIFO               | rIFO               | ISLF               | rSLF               |
| Age                          | r <sub>s</sub> | <b>-0.193</b>  | <b>-0.269</b>      | <b>-0.348</b>      | <b>-0.291</b>      | <b>-0.281</b>      | <b>-0.159</b> | <b>-0.257</b>      | <b>0.242</b>       | <b>0.244</b>       | <b>0.415</b>       | <b>0.248</b>       | <b>0.255</b>       | <b>0.298</b>       | <b>0.337</b>       |
|                              | p              | <b>0.004**</b> | <b>&lt;0.001**</b> | <b>&lt;0.001**</b> | <b>&lt;0.001**</b> | <b>&lt;0.001**</b> | <b>0.017*</b> | <b>&lt;0.001**</b> | <b>&lt;0.001**</b> | <b>&lt;0.001**</b> | <b>&lt;0.001**</b> | <b>&lt;0.001**</b> | <b>&lt;0.001**</b> | <b>&lt;0.001**</b> | <b>&lt;0.001**</b> |
| BMI                          | r <sub>s</sub> | <b>0.220</b>   | <b>0.155</b>       | 0.069              | 0.088              | 0.105              | -0.046        | 0.021              | <b>-0.143</b>      | -0.079             | -0.065             | -0.052             | -0.041             | 0.015              | 0.001              |
|                              | p              | <b>0.001**</b> | <b>0.020*</b>      | 0.307              | 0.188              | 0.116              | 0.489         | 0.749              | <b>0.033*</b>      | 0.238              | 0.334              | 0.439              | 0.546              | 0.819              | 0.992              |
| Brinkman Index<br>(n=207)    | r <sub>s</sub> | 0.065          | 0.010              | 0.019              | -0.095             | -0.091             | 0.015         | 0.050              | -0.011             | 0.023              | 0.017              | 0.088              | 0.051              | 0.051              | 0.043              |
|                              | p              | 0.351          | 0.890              | 0.784              | 0.173              | 0.194              | 0.829         | 0.472              | 0.877              | 0.737              | 0.807              | 0.206              | 0.464              | 0.466              | 0.539              |
| sBP                          | r <sub>s</sub> | -0.077         | -0.032             | -0.076             | -0.123             | -0.122             | <b>-0.161</b> | <b>-0.192</b>      | 0.036              | -0.015             | 0.057              | 0.120              | 0.091              | 0.119              | 0.060              |
|                              | p              | 0.254          | 0.637              | 0.254              | 0.066              | 0.068              | <b>0.016*</b> | <b>0.004**</b>     | 0.587              | 0.823              | 0.399              | 0.074              | 0.177              | 0.076              | 0.370              |
| dBP                          | r <sub>s</sub> | -0.117         | -0.004             | -0.029             | -0.074             | -0.048             | <b>-0.167</b> | <b>-0.141</b>      | 0.053              | -0.076             | -0.012             | 0.079              | 0.006              | 0.096              | 0.025              |
|                              | p              | 0.081          | 0.948              | 0.670              | 0.273              | 0.475              | <b>0.012*</b> | <b>0.036*</b>      | 0.428              | 0.258              | 0.854              | 0.241              | 0.923              | 0.151              | 0.712              |
| LDL-C<br>(n=223)             | r <sub>s</sub> | -0.017         | 0.023              | 0.038              | 0.008              | 0.046              | -0.039        | 0.013              | -0.056             | <b>-0.142</b>      | -0.066             | 0.010              | -0.086             | 0.010              | -0.093             |
|                              | p              | 0.805          | 0.731              | 0.575              | 0.903              | 0.491              | 0.557         | 0.851              | 0.403              | <b>0.034*</b>      | 0.328              | 0.879              | 0.199              | 0.885              | 0.166              |
| HDL-C<br>(n=223)             | r <sub>s</sub> | -0.068         | -0.079             | 0.008              | -0.042             | -0.066             | -0.066        | -0.059             | -0.001             | -0.015             | -0.074             | 0.032              | 0.038              | 0.053              | -0.010             |
|                              | p              | 0.310          | 0.242              | 0.905              | 0.530              | 0.323              | 0.324         | 0.381              | 0.990              | 0.827              | 0.269              | 0.639              | 0.571              | 0.431              | 0.884              |
| TG<br>(n=223)                | r <sub>s</sub> | <b>0.141</b>   | <b>0.187</b>       | <b>0.151</b>       | <b>0.133</b>       | <b>0.161</b>       | <b>0.147</b>  | 0.127              | -0.121             | <b>-0.150</b>      | -0.108             | -0.071             | <b>-0.145</b>      | -0.130             | <b>-0.148</b>      |
|                              | p              | <b>0.036*</b>  | <b>0.005**</b>     | <b>0.024*</b>      | <b>0.047*</b>      | <b>0.016*</b>      | <b>0.028*</b> | 0.058              | 0.071              | <b>0.025*</b>      | 0.109              | 0.289              | <b>0.031*</b>      | 0.053              | <b>0.027*</b>      |
| HbA1c<br>(n=222)             | r <sub>s</sub> | 0.046          | 0.031              | -0.069             | -0.092             | -0.060             | 0.046         | 0.028              | 0.011              | -0.006             | 0.005              | -0.031             | -0.048             | -0.015             | -0.010             |
|                              | p              | 0.499          | 0.644              | 0.304              | 0.174              | 0.376              | 0.500         | 0.681              | 0.875              | 0.926              | 0.940              | 0.641              | 0.473              | 0.819              | 0.882              |
| GA/HbA1c<br>(n=204)          | r <sub>s</sub> | <b>-0.144</b>  | <b>-0.223</b>      | <b>-0.224</b>      | <b>-0.278</b>      | <b>-0.267</b>      | -0.080        | <b>-0.157</b>      | <b>0.179</b>       | <b>0.219</b>       | <b>0.175</b>       | <b>0.160</b>       | <b>0.185</b>       | 0.103              | <b>0.221</b>       |
|                              | p              | <b>0.040*</b>  | <b>0.001**</b>     | <b>0.001**</b>     | <b>&lt;0.001**</b> | <b>&lt;0.001**</b> | 0.253         | <b>0.025*</b>      | <b>0.011*</b>      | <b>0.002**</b>     | <b>0.012*</b>      | <b>0.023*</b>      | <b>0.008**</b>     | 0.143              | <b>0.002**</b>     |
| Physical Activity<br>(n=220) | r <sub>s</sub> | 0.049          | 0.061              | 0.044              | 0.055              | 0.102              | 0.053         | 0.070              | -0.123             | <b>-0.156*</b>     | -0.099             | -0.045             | -0.095             | -0.096             | -0.074             |
|                              | p              | 0.473          | 0.369              | 0.518              | 0.420              | 0.131              | 0.432         | 0.300              | 0.068              | <b>0.020*</b>      | 0.144              | 0.509              | 0.158              | 0.157              | 0.276              |

FA: fractional anisotropy, MD: mean diffusivity, ATR: anterior thalamic radiation, FM; Forceps minor, IFOF: inferior frontooccipital fasciculus, SLF: superior longitudinal fasciculus  
 BMI: body mass index, sBP: systolic blood pressure, dBP: diastolic blood pressure, TG: triglyceride, GA: glycoalbumin, HbA1c: glycohemoglobin, r<sub>s</sub>: Spearman's correlation coefficient  
 \*\*p<0.01, \*p<0.05 Bold values indicate p<0.05.
